# Supplementary material for: Alkyl-substituted bis(4-((9H-fluoren-9-ylidene)methyl)phenyl)thiophenes: weakening of intermolecular interactions and additive-assisted crystallization
Source: Royal Society of Chemistry journal article supplement (doi:10.1039/d0ce01794a), 2021-01-01
Supplement: d0ce01794a1.pdf [file d0ce01794a1.pdf]

Electronic Supplementary Information  
**Alkyl-Substituted Bis(4-((9H-fluoren-9-ylidene)methyl)phenyl)thiophenes: Weakening of Intermolecular Interactions and Additive-Assisted Crystallization**

**Alina A. Sonina, Christina S. Becker, Anatoly D. Kuimov, Inna K. Shundrina, Vladislav Yu. Komarov and Maxim S. Kazantsev**

**1. Characterization**

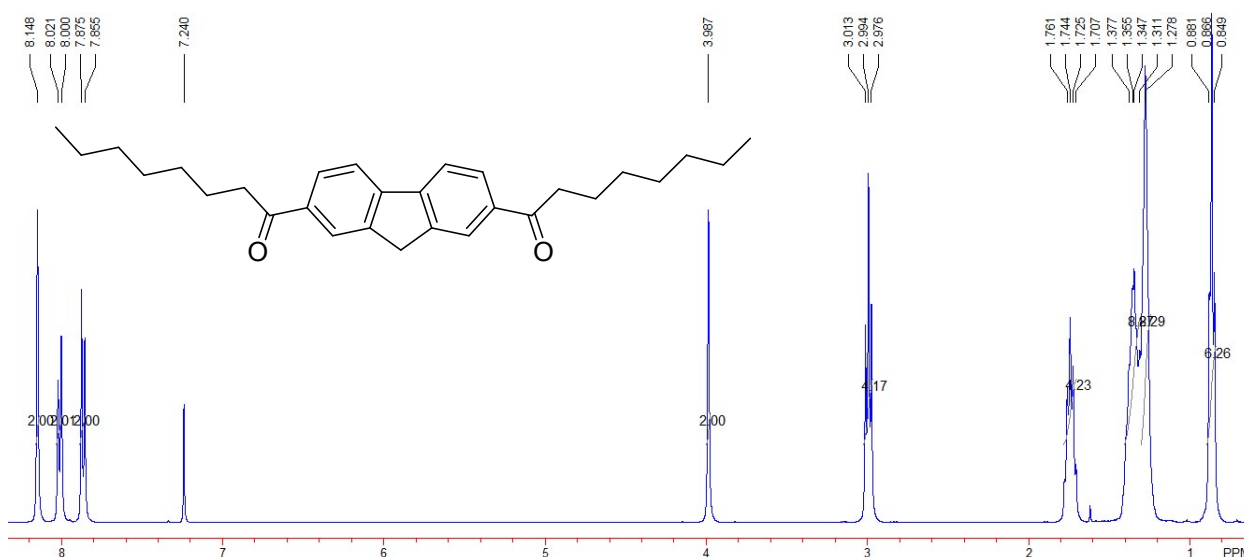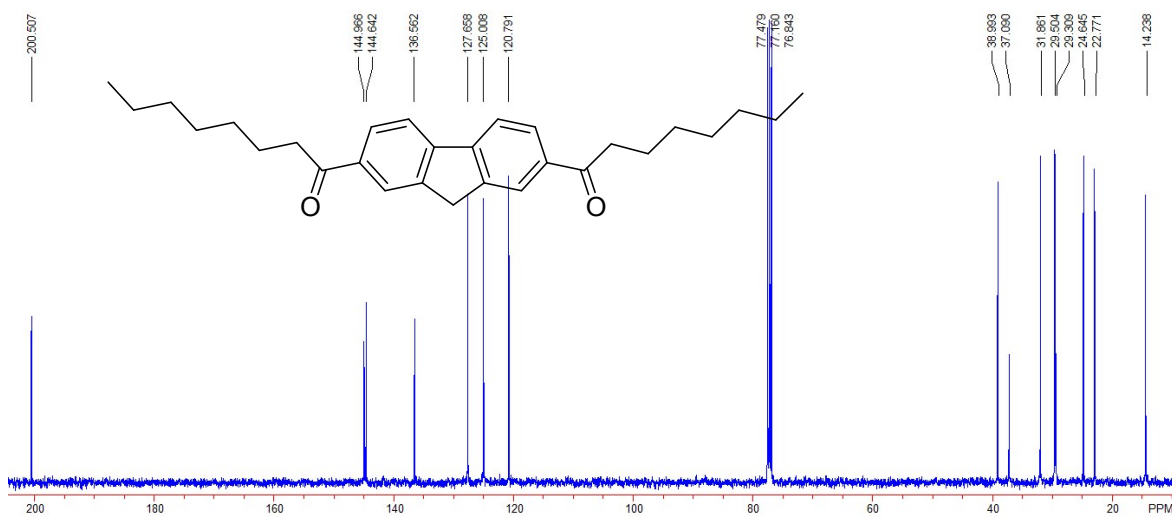

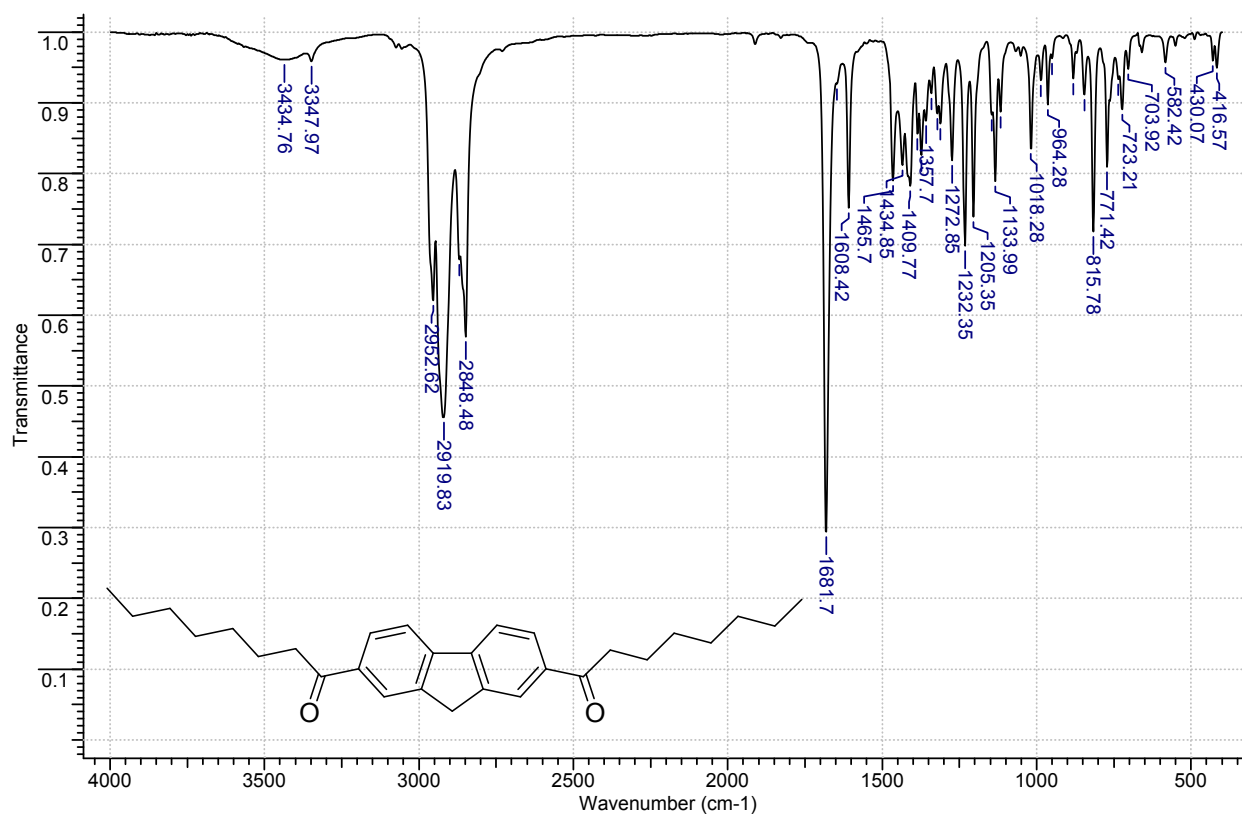

**Figure S3.** IR spectrum of compound **1b** in KBr pellets.

K719\_191226141049 #4 RT: 0.24 AV: 1 NL: 7.76E7  
T: + c EI Full ms [14.50-450.50]

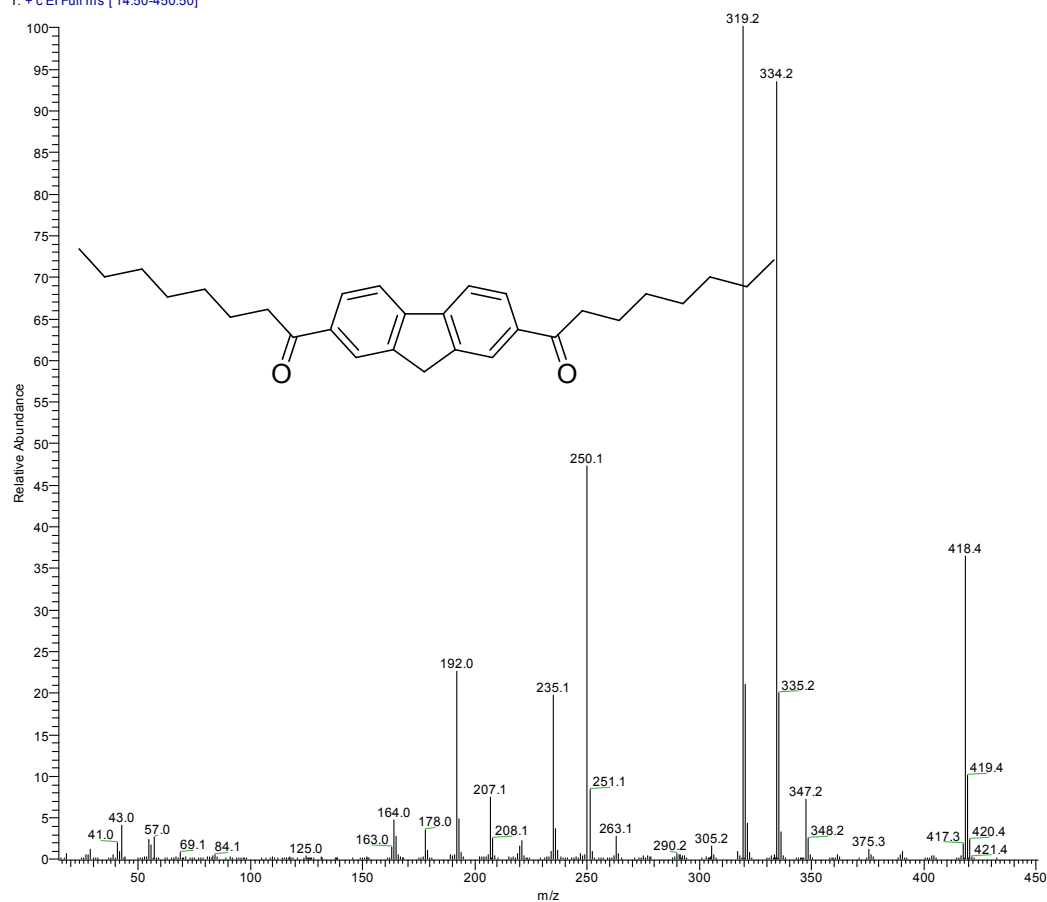

**Figure S4.** HRMS spectrum of compound **1b** (T<sub>source</sub>=65 °C, T<sub>probe</sub>=200 °C).

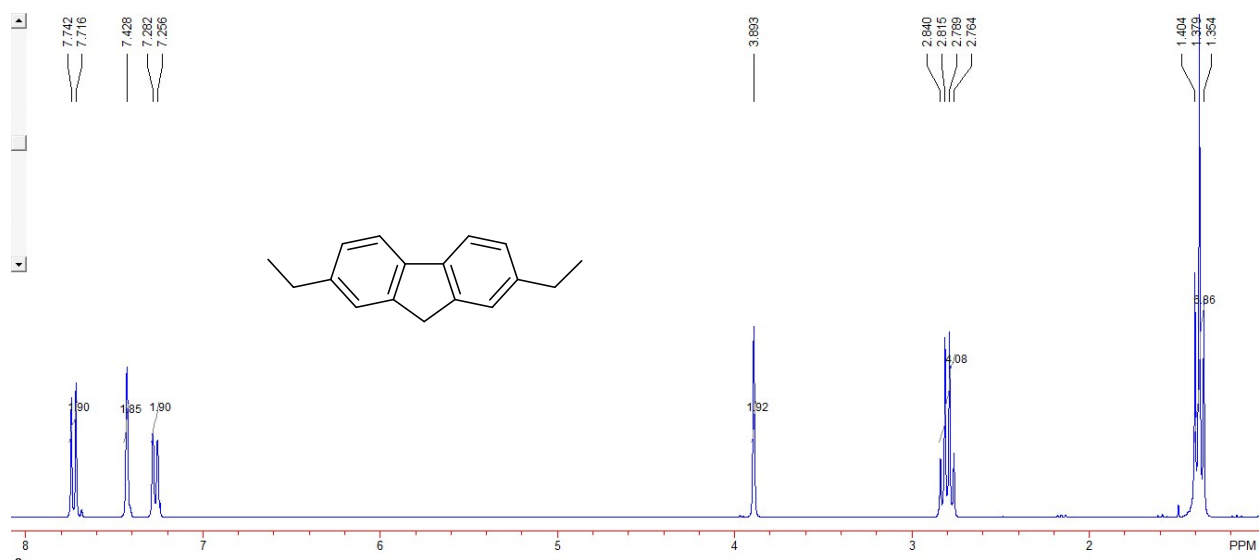

**Figure S5.**  $^1\text{H}$  NMR spectrum of compound **2a** in  $\text{CDCl}_3$ .

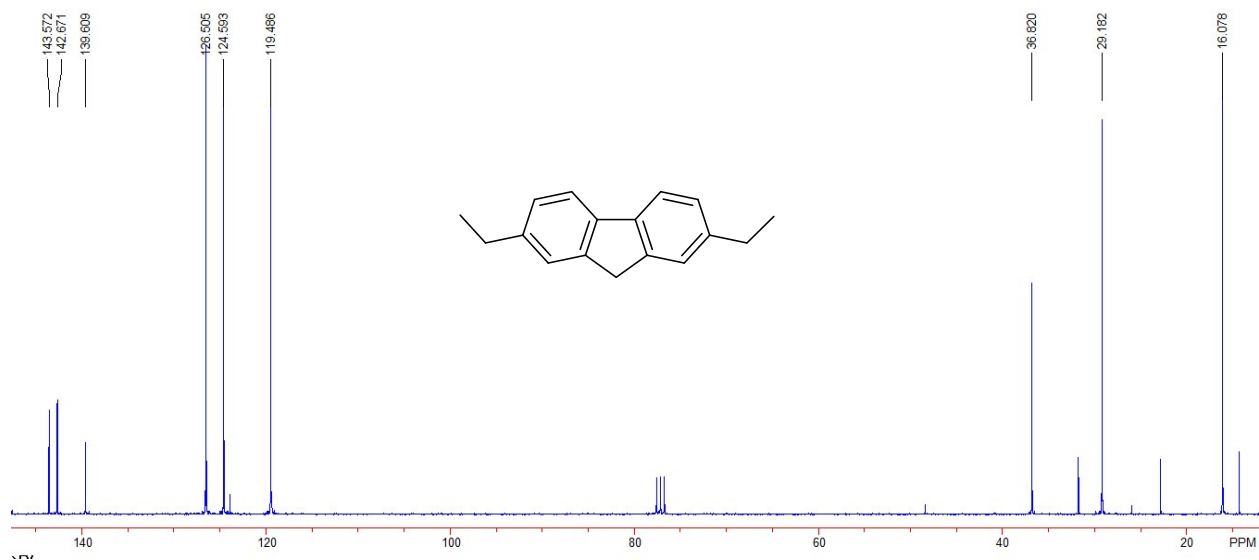

**Figure S6.**  $^{13}\text{C}$  NMR spectrum of compound **2a** in  $\text{CDCl}_3$ .

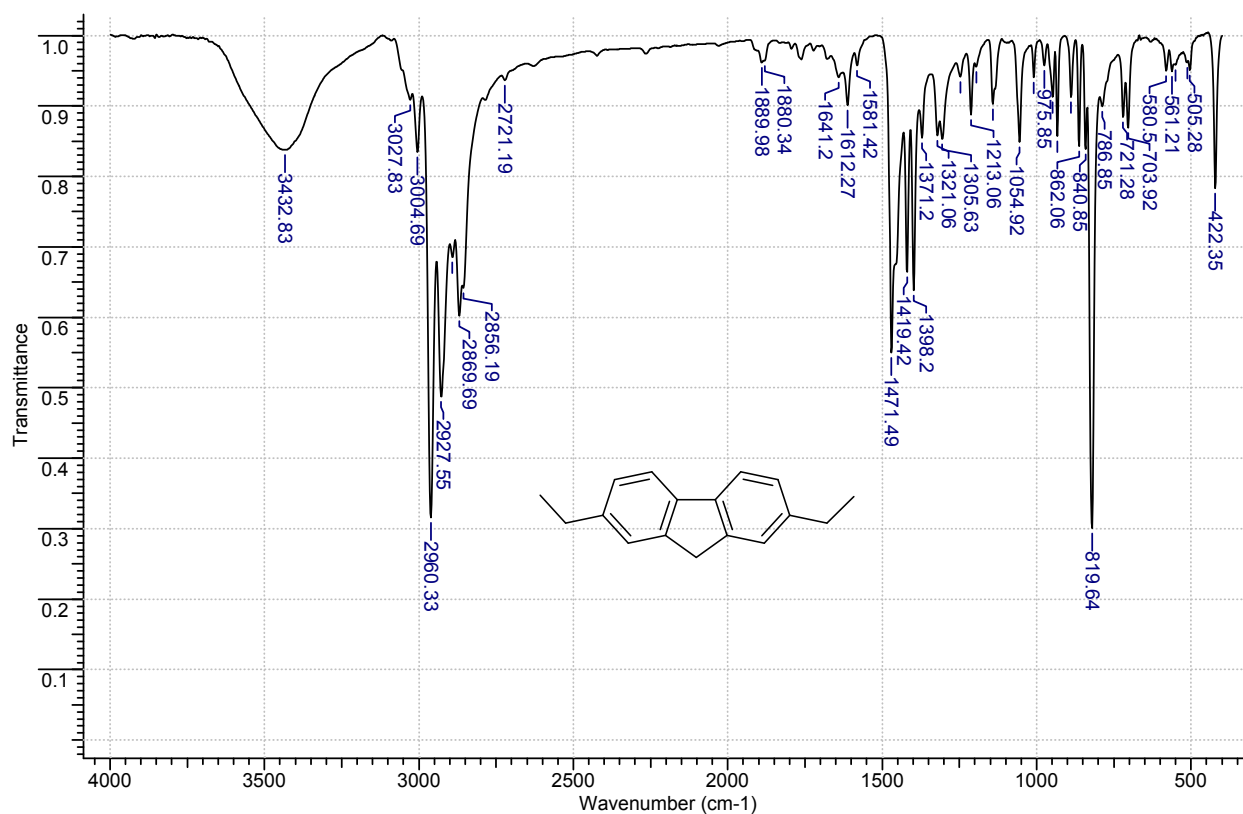

**Figure S7.** IR spectrum of compound **2a** in KBr pellets.

K785 #31 RT: 0.74 AV: 1 NL: 7.13E7  
T: +c EI Full ms [ 32.50-240.50]

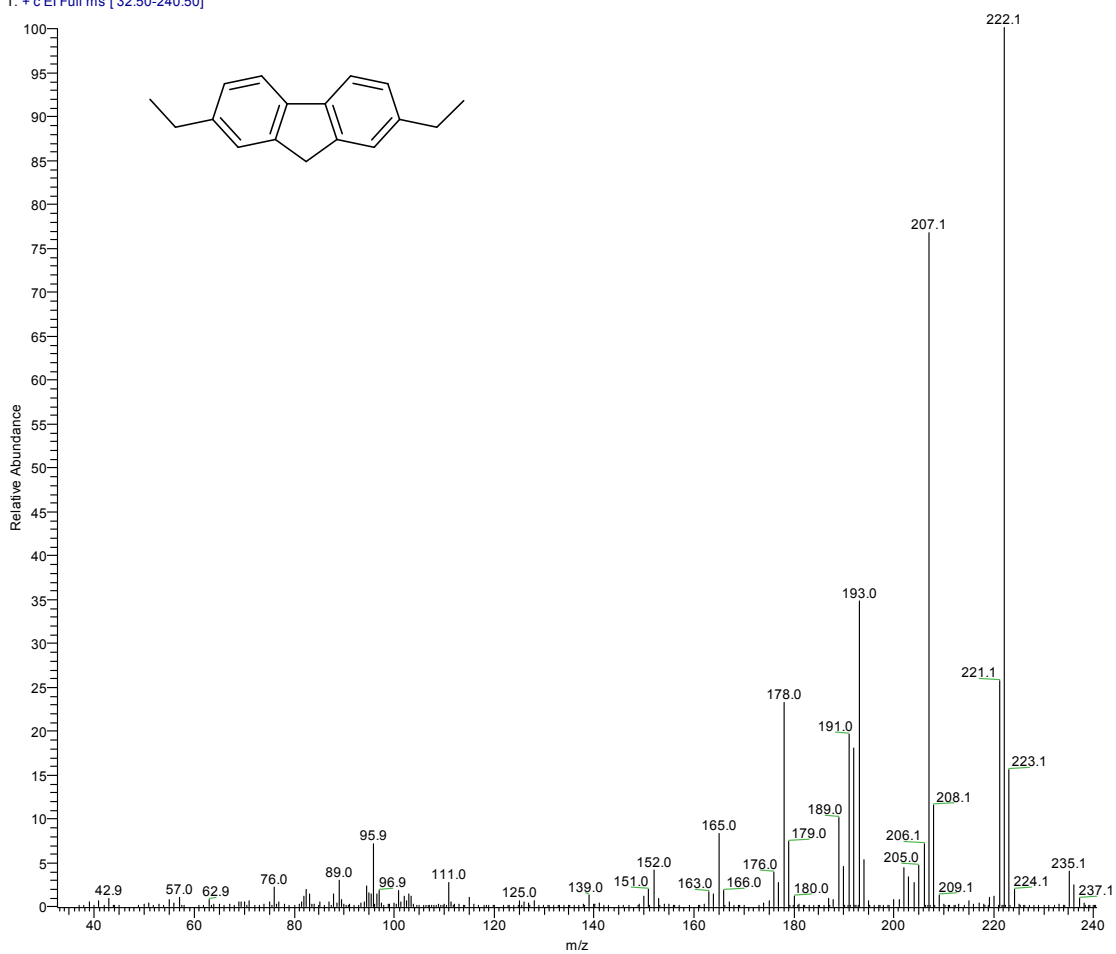

**Figure S8.** HRMS spectrum of compound **2a** (T<sub>source</sub>=50 °C).

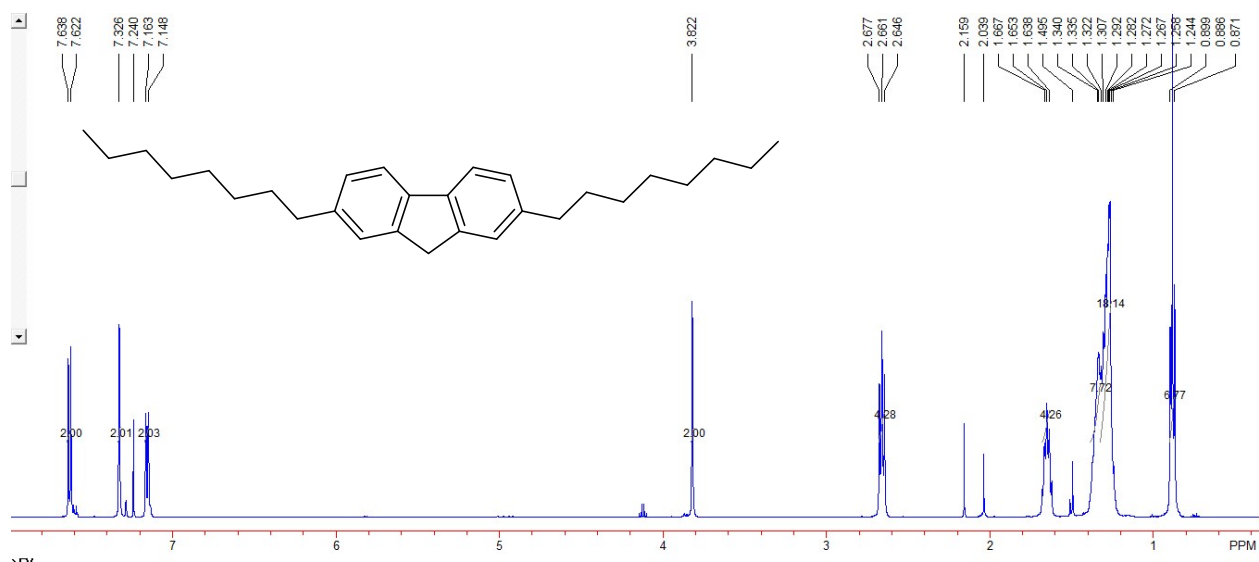

**Figure S9.**  $^1\text{H}$  NMR spectrum of compound **2b** in  $\text{CDCl}_3$ .

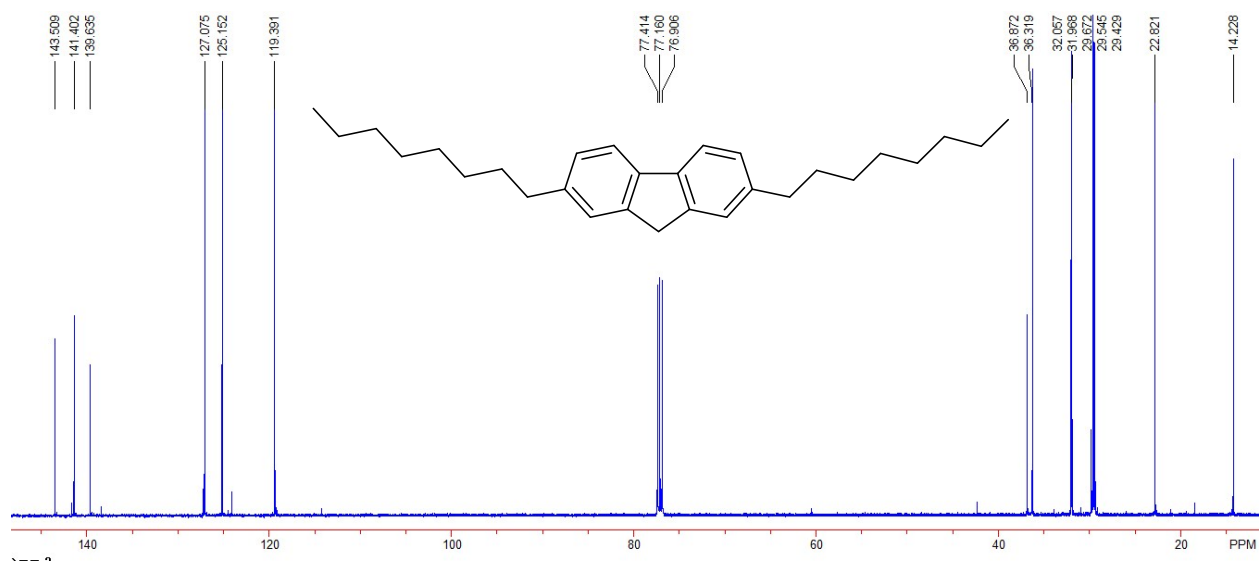

**Figure S10.**  $^{13}\text{C}$  NMR spectrum of compound **2b** in  $\text{CDCl}_3$ .

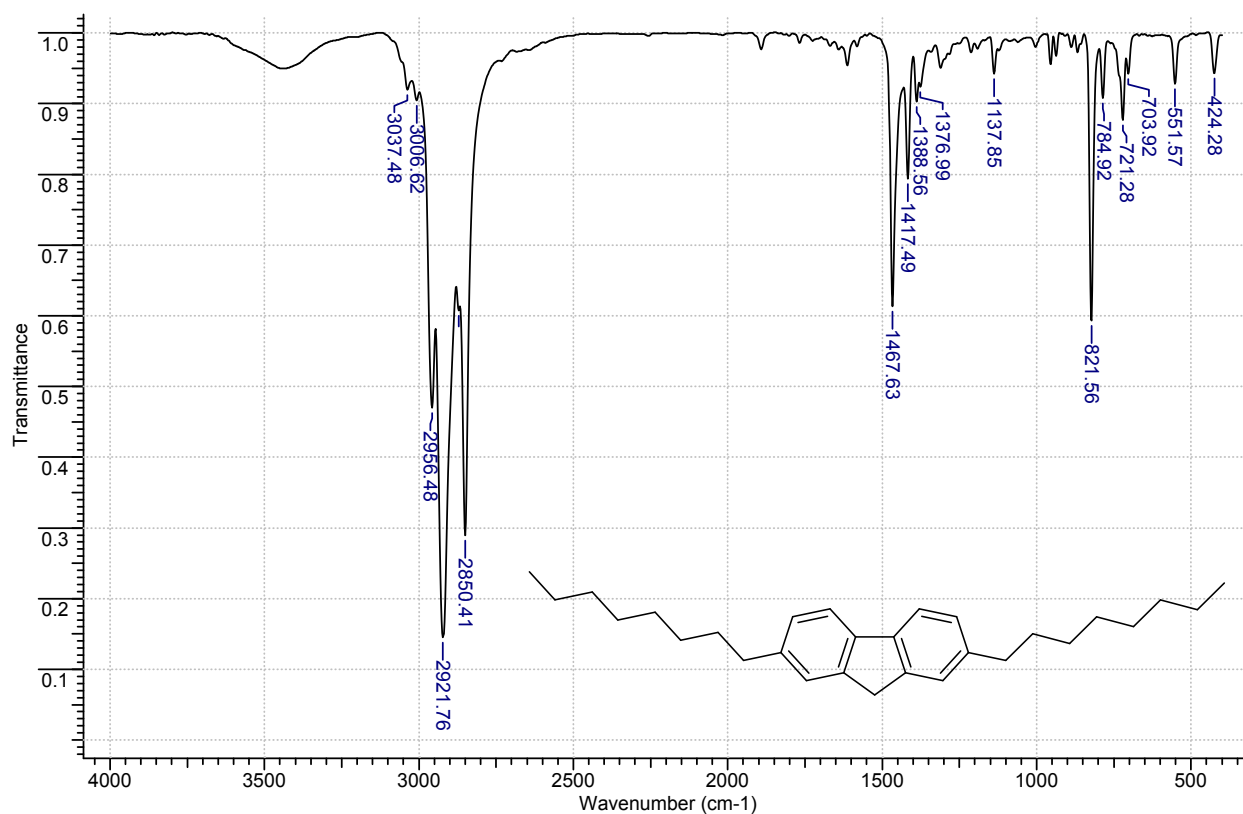

**Figure S11.** IR spectrum of compound **2b** in KBr pellets.

K726 #32 RT: 2.49 AV: 1 NL: 3.91E7  
T: + c EI Full ms [ 14.50-550.50]

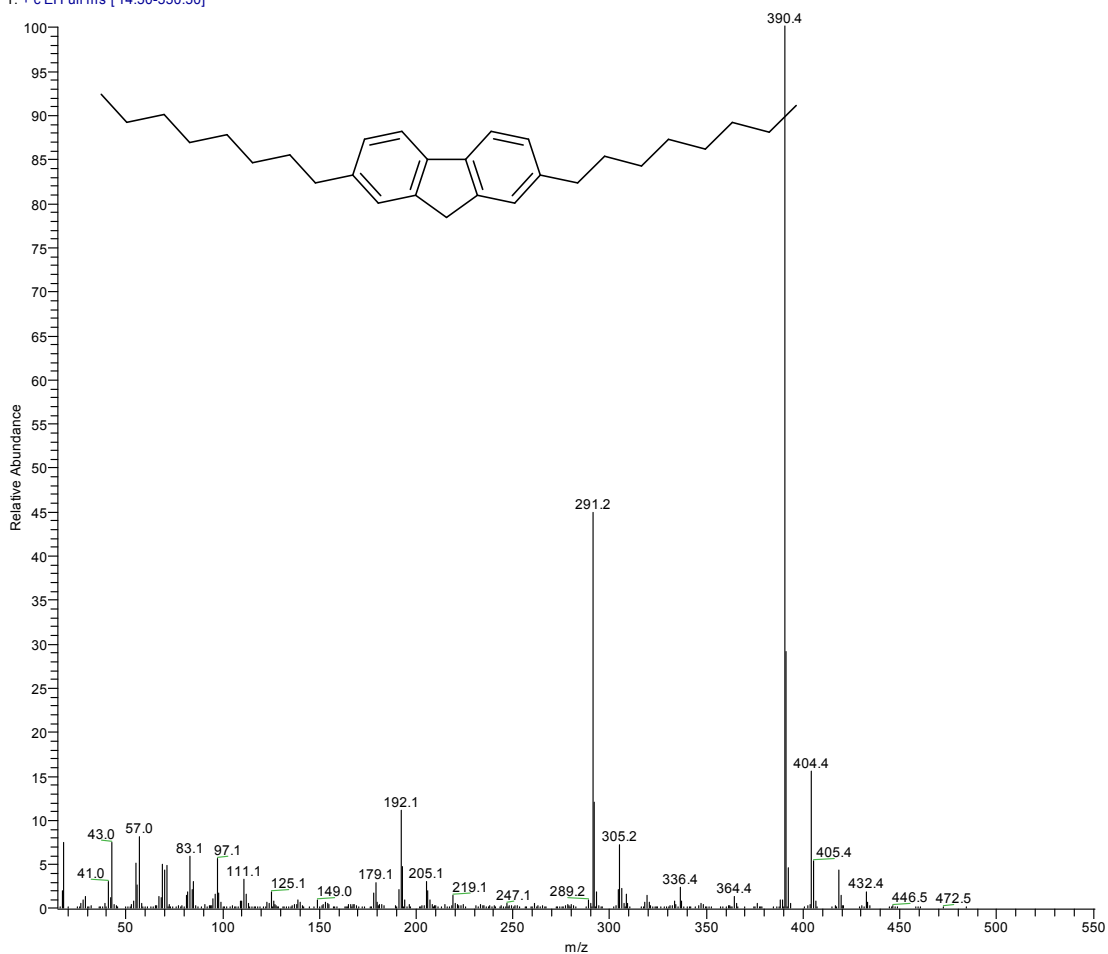

**Figure S12.** HRMS spectrum of compound **2b** (T<sub>source</sub>=50 °C, T<sub>probe</sub>=185 °C).

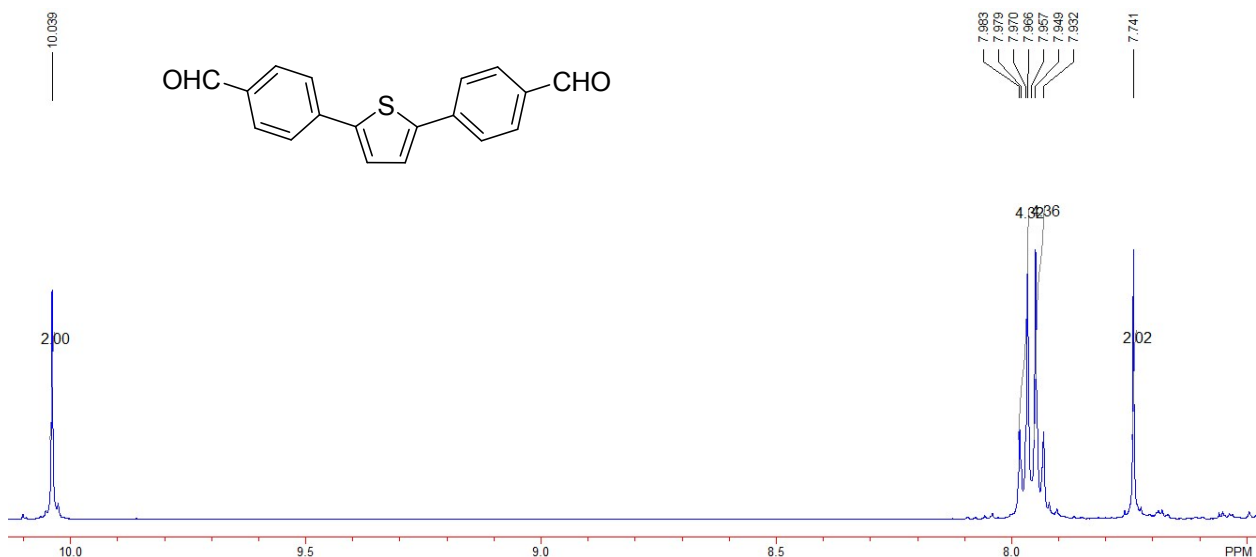

Figure S13. <sup>1</sup>H NMR spectrum of compound 3 in (CD<sub>3</sub>)CO.

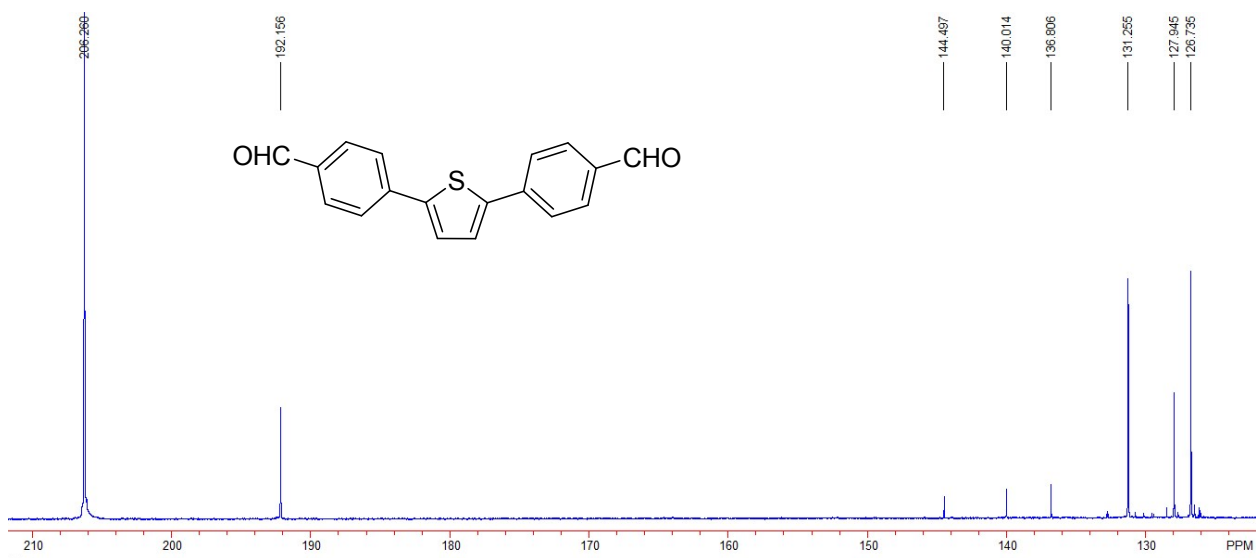

Figure S14. <sup>13</sup>C NMR spectrum of compound 3 in (CD<sub>3</sub>)CO.

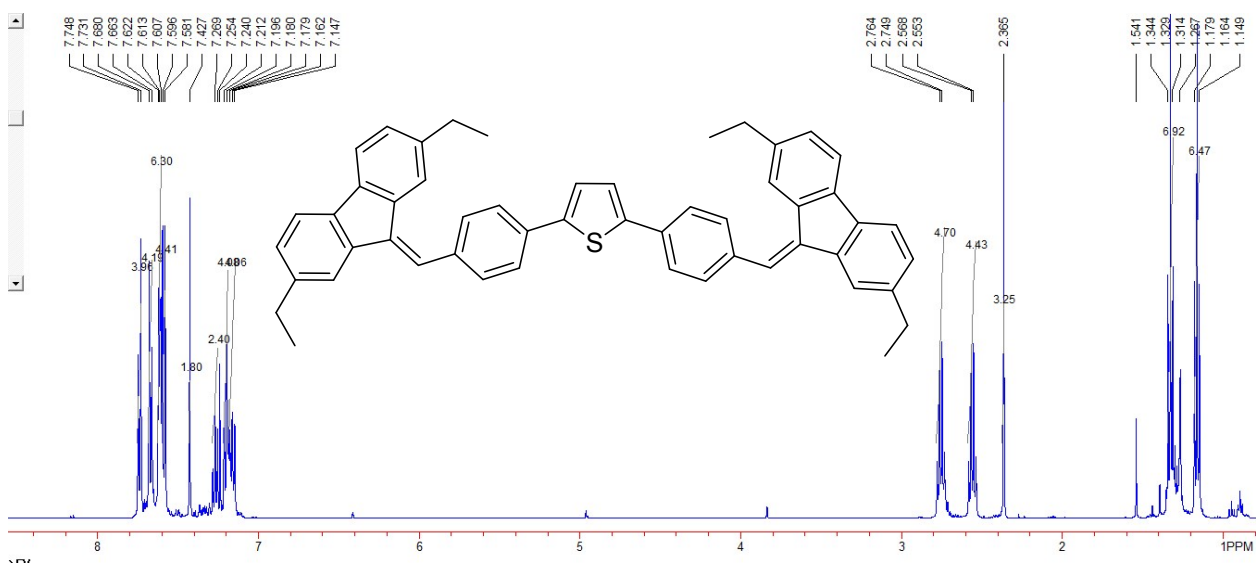

Figure S15. <sup>1</sup>H NMR spectrum of compound C2-BFMPT (+ toluene 1:1) in CDCl<sub>3</sub>.

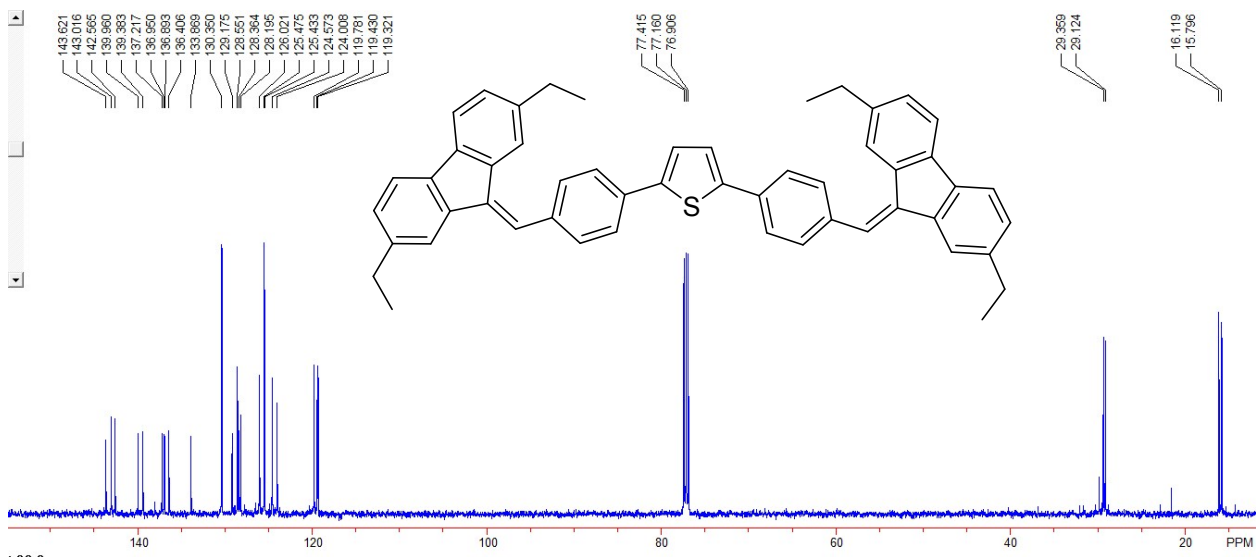

**Figure S16.** <sup>13</sup>C NMR spectrum of compound C2-BFMPT in CDCl<sub>3</sub>.

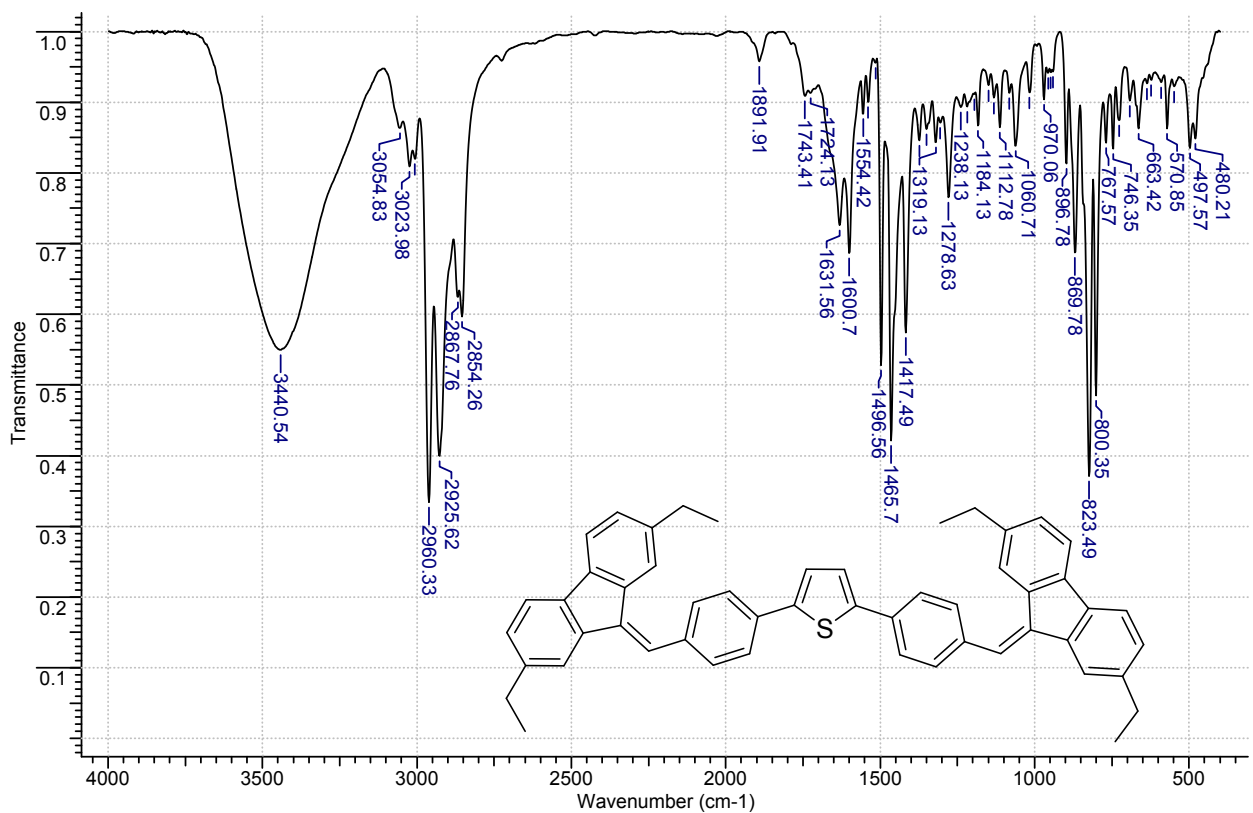

**Figure S17.** IR spectrum of compound C2-BFMPT in KBr pellets.



K787Y\_200715180215 #5 RT: 0.13 AV: 1 NL: 4.44E7  
T: + c EI Full ms [ 14.50-730.50]

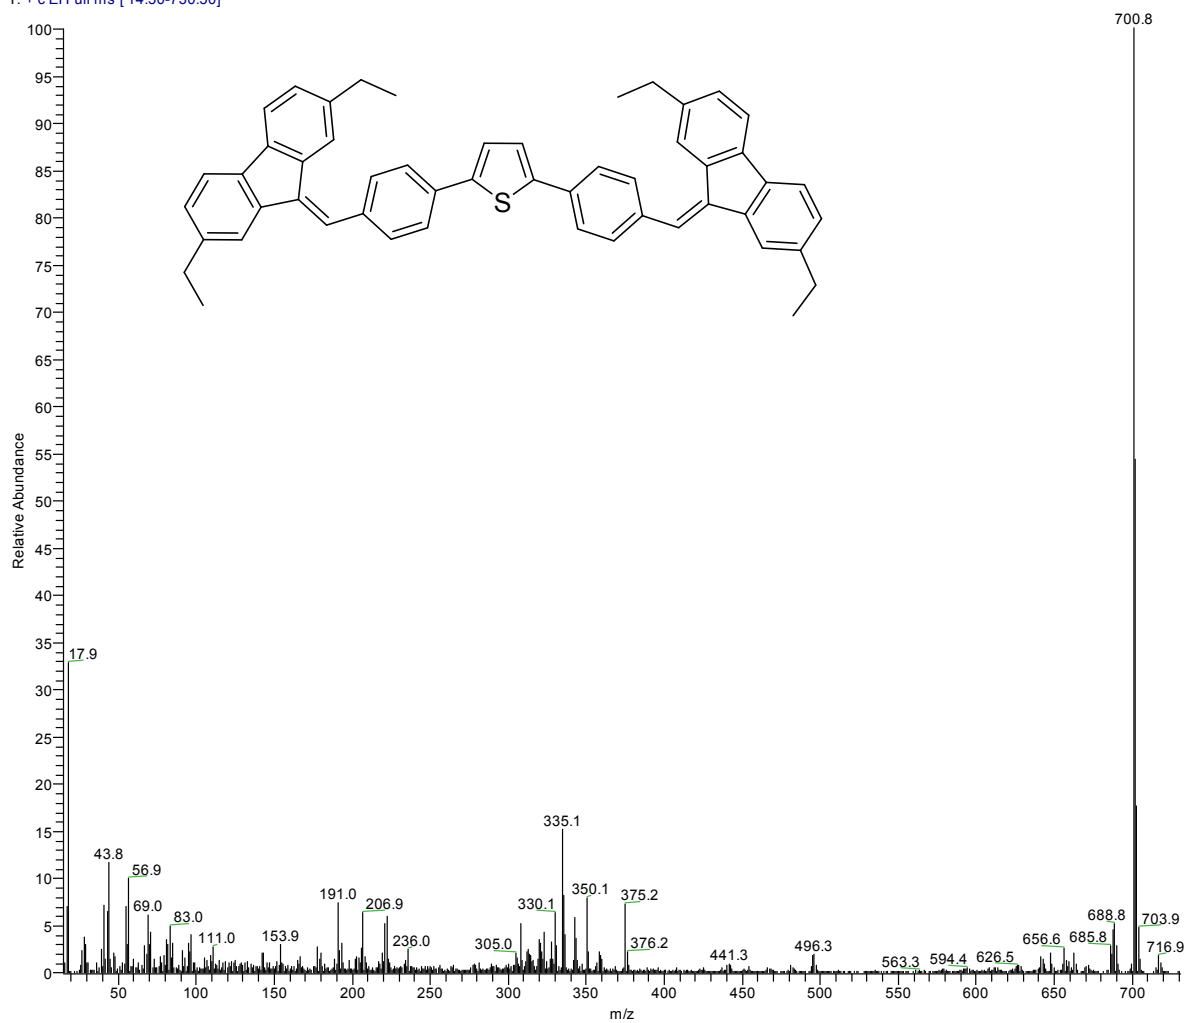

Figure S18. HRMS spectrum of compound C2-BFMPT (T<sub>source</sub>=95 °C, T<sub>probe</sub>=340 °C).

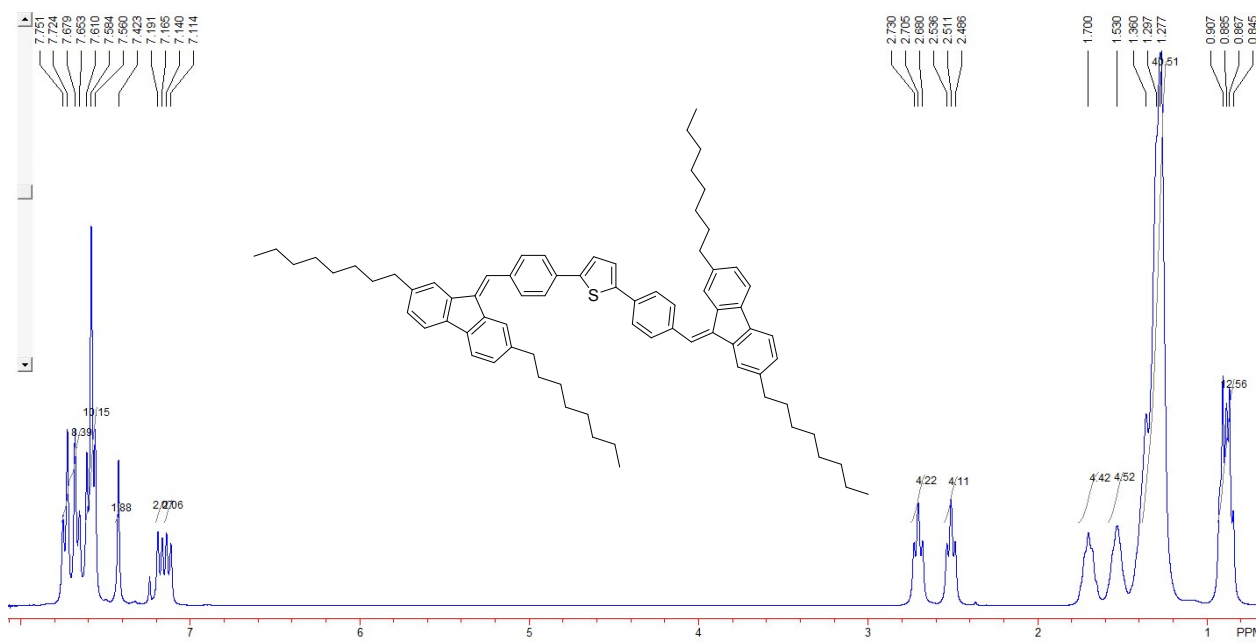

Figure S19. <sup>1</sup>H NMR spectrum of compound C8-BFMPT in CDCl<sub>3</sub>.

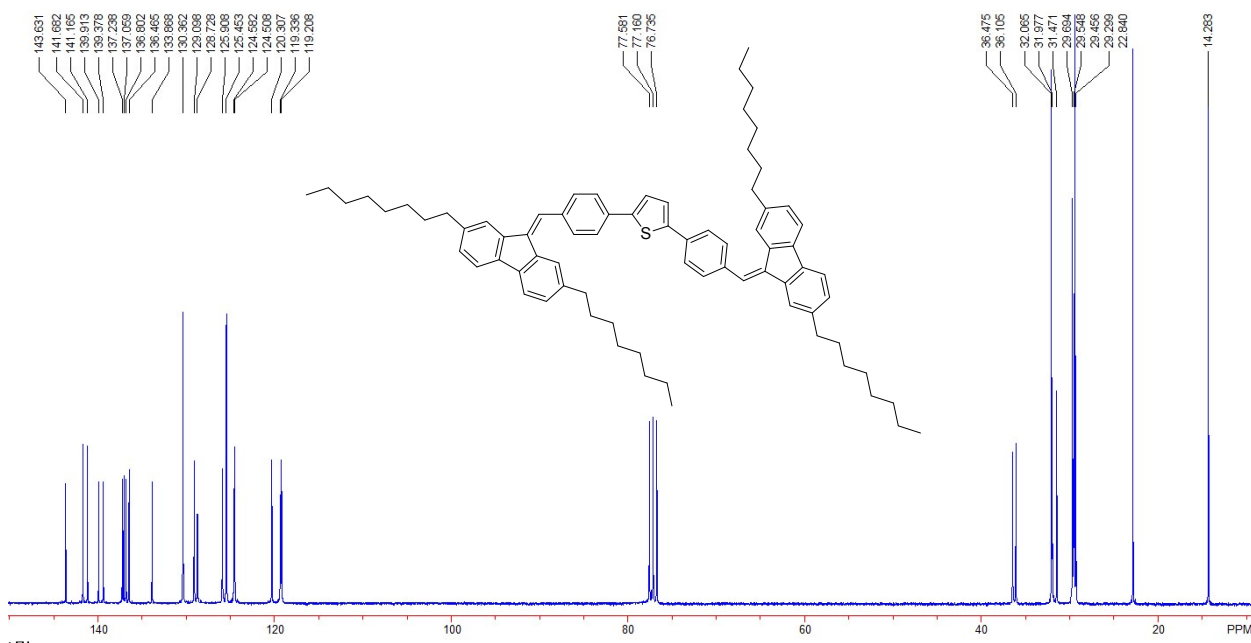

**Figure S20.**  $^{13}\text{C}$  NMR spectrum of compound **C8-BFMPT** in  $\text{CDCl}_3$ .

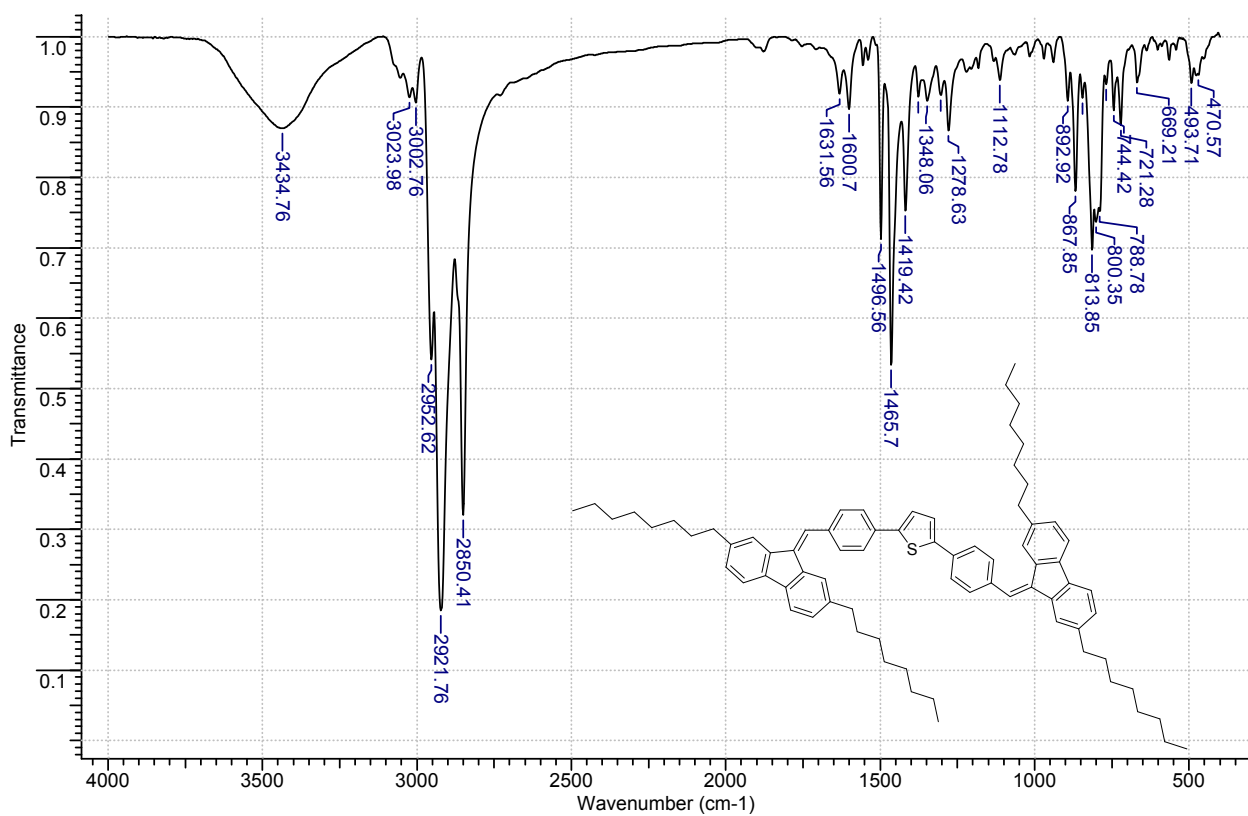

**Figure S21.** IR spectrum of compound **C8-BFMPT** in KBr pellets.

K753-Y#75 RT: 4.25 AV: 1 NL: 1.09E7  
T: + c EI Full ms [ 1028.50-1044.50]

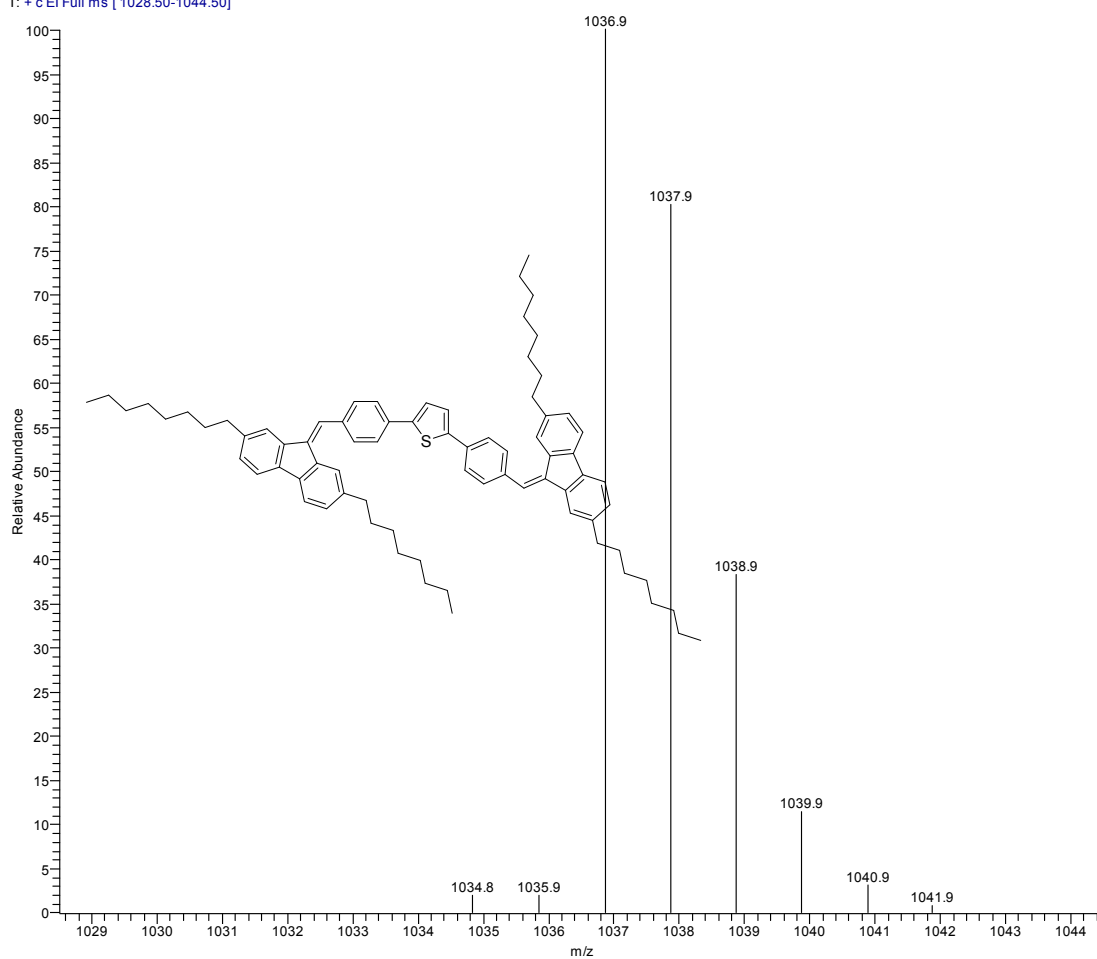

**Figure S22.** HRMS spectrum of compound C8-BFMPT (T<sub>source</sub>=100 °C, T<sub>probe</sub>=340 °C).

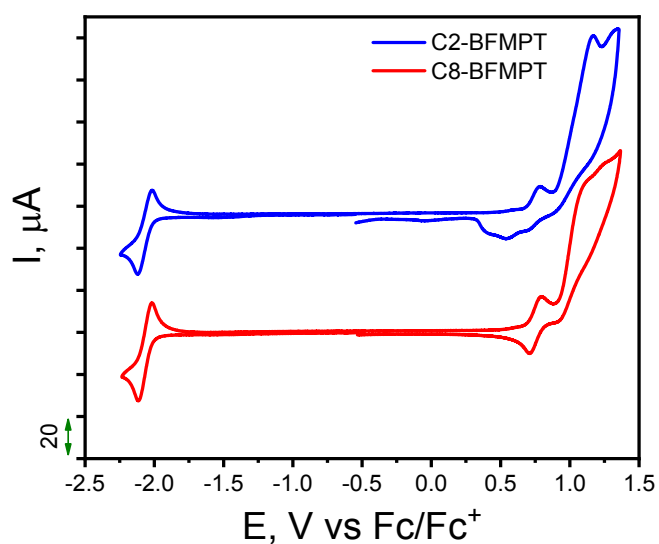

**Figure S23.** Cyclic voltammograms of C2-BFMPT (blue) and C8-BFMPT (red) in CH<sub>2</sub>Cl<sub>2</sub> solution.

## 2. Crystal data

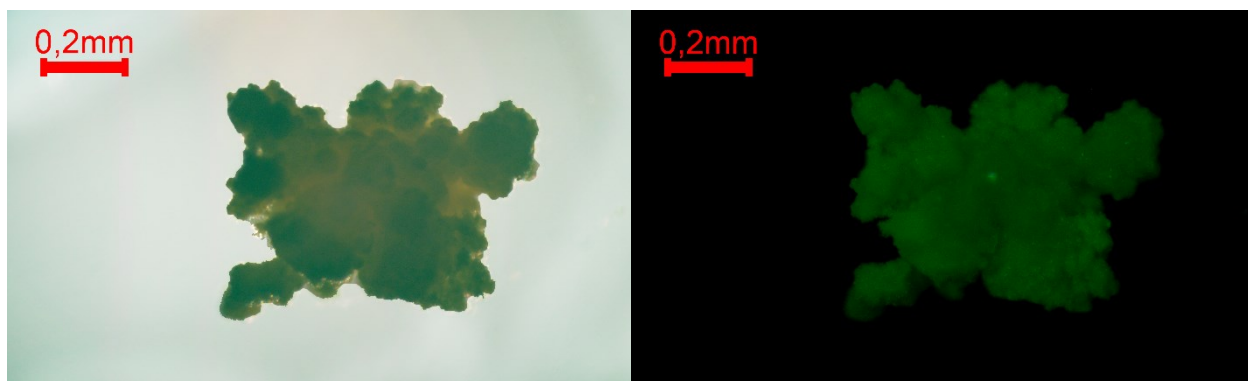

**Figure S24.** Optical image in transmitted light (left) and under blue laser irradiation (right) of C8-BFMPT polycrystalline sample obtained in neat conditions (form I).

**Table S1.** Crystallographic, structural data and experimental details for C2-BFMPT and C8-BFMPT Form II at 200K and 80K.

| Compound                                                                   | C2-BFMPT                                                             |                                                                      | C8-BFMPT Form II                                                     |                                                                      |
|----------------------------------------------------------------------------|----------------------------------------------------------------------|----------------------------------------------------------------------|----------------------------------------------------------------------|----------------------------------------------------------------------|
| Empirical formula                                                          | $C_{52}H_{44}S$                                                      |                                                                      | $C_{76}H_{92}S$                                                      |                                                                      |
| Molecular weight                                                           | 700.93                                                               |                                                                      | 1037.55                                                              |                                                                      |
| Crystal system, space group                                                | Monoclinic, $P2_1$                                                   |                                                                      | Monoclinic, $P2_1/c$                                                 |                                                                      |
| Temperature, K                                                             | 80(2)                                                                | 200(1)                                                               | 80(2)                                                                | 200(1)                                                               |
| Radiation                                                                  | CuK $\alpha$                                                         | MoK $\alpha$                                                         | CuK $\alpha$                                                         | MoK $\alpha$                                                         |
| $a, b, c$ (Å)                                                              | 16.5329(4)<br>9.1211(2)<br>24.9977(6)                                | 16.581 (6),<br>9.216 (3),<br>25.101 (9)                              | 5.6172(4),<br>56.654(4),<br>19.3396(13)                              | 5.589 (1),<br>56.50 (1),<br>19.860 (4)                               |
| $\beta$ (°)                                                                | 90.6940(10)                                                          | 90.1 (1)                                                             | 91.715(2)                                                            | 91.756 (5)                                                           |
| Volume (Å <sup>3</sup> )                                                   | 3769.33(15)                                                          | 3836 (2)                                                             | 6151.8(7)                                                            | 6268 (2)                                                             |
| $Z$                                                                        | 4                                                                    | 4                                                                    | 4                                                                    | 4                                                                    |
| $D_{\text{calcd.}}$ (g·cm <sup>-3</sup> )                                  | 1.235                                                                | 1.214                                                                | 1.120                                                                | 1.099                                                                |
| $\mu$ (mm <sup>-1</sup> )                                                  | 1.027                                                                | 0.12                                                                 | 0.77                                                                 | 0.09                                                                 |
| Crystal size (mm)                                                          | 0.16 × 0.06 × 0.01                                                   | 1.00 × 0.12 × 0.06                                                   | 0.14 × 0.04 × 0.02                                                   | 0.67 × 0.30 × 0.14                                                   |
| No. of measured, independent and observed [ $I > 2\sigma(I)$ ] reflections | 41901, 5183, 3898                                                    | 30271, 8241, 7315                                                    | 30250, 3766, 2597                                                    | 25860, 4531, 3157                                                    |
| $R_{\text{int}}$                                                           | 0.088                                                                | 0.058                                                                | 0.049                                                                | 0.076                                                                |
| $\theta$ range (°)                                                         | 2.67 – 46.12                                                         | 2.59 19.55                                                           | 2.41 38.05                                                           | 2.32 19.26                                                           |
| Range of $h, k, l$                                                         | $-14 \leq h \leq 14,$<br>$-7 \leq k \leq 7,$<br>$-21 \leq l \leq 21$ | $-16 \leq h \leq 16,$<br>$-9 \leq k \leq 9,$<br>$-25 \leq l \leq 25$ | $-4 \leq h \leq 4,$<br>$-47 \leq k \leq 47,$<br>$-16 \leq l \leq 16$ | $-4 \leq h \leq 5,$<br>$-50 \leq k \leq 49,$<br>$-17 \leq l \leq 17$ |
| $R[F^2 > 2\sigma(F^2)], wR(F^2), S$                                        | 0.071, 0.207, 1.04                                                   | 0.046, 0.12, 1.09                                                    | 0.157, 0.553, 1.05                                                   | 0.116,<br>0.339, 1.08                                                |
| No. of parameters                                                          | 845                                                                  | 960                                                                  | 612                                                                  | 936                                                                  |
| No. of restraints                                                          | 3015                                                                 | 990                                                                  | 881                                                                  | 1413                                                                 |
| $\Delta\rho_{\text{max}}, \Delta\rho_{\text{min}}$ (e Å <sup>-3</sup> )    | 0.27, -0.22                                                          | 0.23, -0.25                                                          | 0.39, -0.44                                                          | 0.42, -0.31                                                          |
| Absolute structure parameter                                               | -0.008 (15)                                                          | Twinning involves inversion, so Flack parameter cannot be determined | -                                                                    | -                                                                    |

**Table S2.** Weak noncovalent  $\pi$ - $\pi$  and C-H $\cdots$  $\pi$  interactions in crystals of C2- and C8-BFMPT at 200K. C<sub>g</sub> is the aromatic ring center; D<sub>pln</sub> is the nearest distance between H-atom or aromatic ring center and aromatic ring plane;  $\alpha$ - interplane angle for interacting cycles; D and A are donor and acceptor of hydrogen bond, respectively. Cycle numbers for C2-BFMPT and C8-BFMPT-II are indicated according to Figure 4 and 5 (main text), respectively.

| Compound                    | Interaction                                                     | C <sub>g</sub> $\cdots$ C <sub>g</sub> /H $\cdots$ C <sub>g</sub> /<br>H $\cdots$ A (Å) | D <sub>pln</sub> / D $\cdots$ A<br>(Å) | C-H $\cdots$ C <sub>g</sub> / $\alpha$ /<br>D- H $\cdots$ A (°) |
|-----------------------------|-----------------------------------------------------------------|-----------------------------------------------------------------------------------------|----------------------------------------|-----------------------------------------------------------------|
| <b>C2-BFMPT</b>             | $\pi 7 \cdots \pi 6$                                            | 3.998(6)                                                                                | 3.312(4)                               | 20.7(5)                                                         |
|                             | C14 <sup>(C<sub>g</sub> 5B)</sup> -<br>H $\cdots$ $\pi 1^{(A)}$ | 2.83                                                                                    | 2.82                                   | 146                                                             |
|                             | C13 <sup>(C<sub>g</sub> 5A)</sup> -H $\cdots$ $\pi 4$           | 2.91                                                                                    | 2.81                                   | 123                                                             |
|                             | C25' <sup>(A)</sup> -H $\cdots$ $\pi 8^{(B)}$                   | 2.86                                                                                    | 2.76                                   | 138                                                             |
|                             | C26' <sup>(A)</sup> -H $\cdots$ $\pi 7^{(B)}$                   | 2.73                                                                                    | 2.69                                   | 141                                                             |
|                             | C4' <sup>(A)</sup> -H $\cdots$ $\pi 9^{(B)}$                    | 2.68                                                                                    | 2.62                                   | 169                                                             |
|                             | C15'-H $\cdots$ $\pi 7$                                         | 2.77                                                                                    | 2.73                                   | 154                                                             |
|                             | C25'-H $\cdots$ $\pi 4$                                         | 2.68                                                                                    | 2.61                                   | 140                                                             |
|                             | C13'-H $\cdots$ $\pi 2$                                         | 2.64                                                                                    | 2.64                                   | 146                                                             |
| <b>C8-BFMPT<br/>Form II</b> | C25'-H $\cdots$ $\pi 7$                                         | 3.01                                                                                    | 2.97                                   | 116                                                             |
|                             | C28-h28b $\cdots$ $\pi 9$                                       | 2.81                                                                                    | 2.79                                   | 149                                                             |
|                             | C2A-H2AA $\cdots$ $\pi 7$                                       | 3.04                                                                                    | 2.95                                   | 156                                                             |

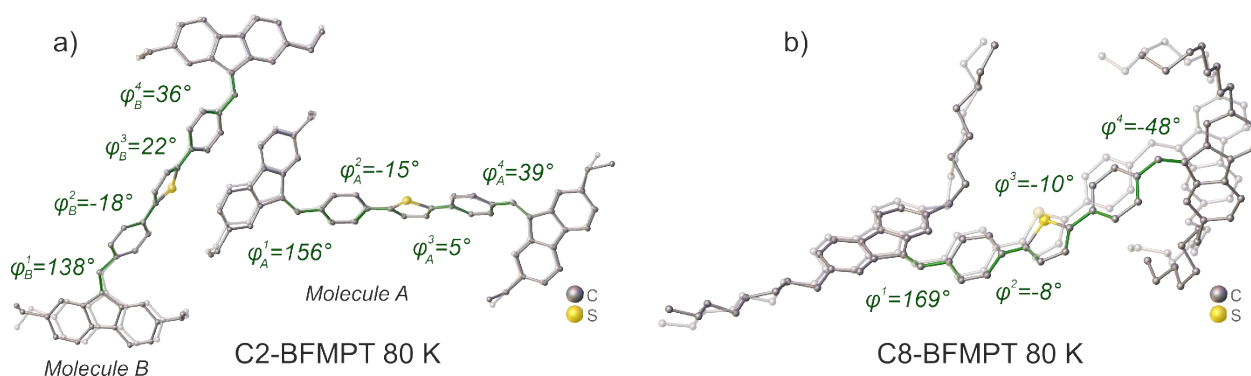

**Figure S25.** Molecular structures of C2- and C8-BFMPT at 80K with disordered groups (translucent) drawn with fixed atomic radii for clarity. The torsional angles are similar and the difference is no more than  $10^\circ$  as compared to that at 200K.

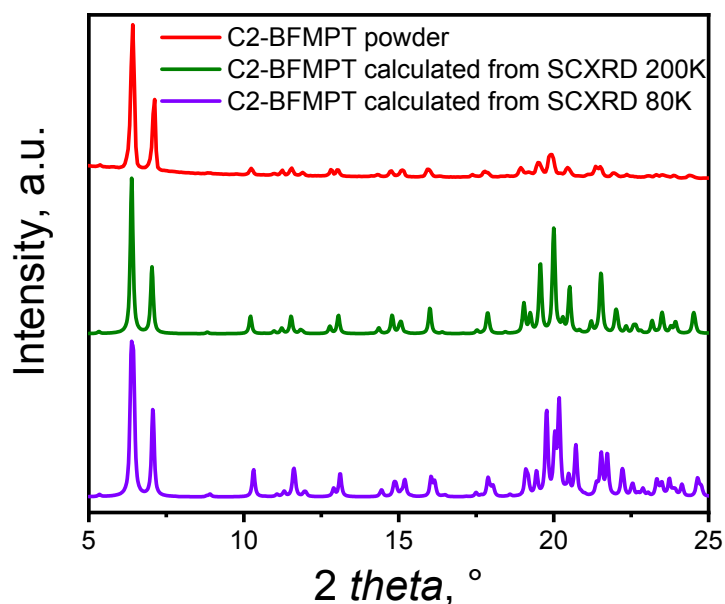

**Figure S26.** The powder X-ray diffraction powder patterns of C2-BFMPT at ambient temperature (red) and calculated from single-crystal X-ray data at 200 K (olive) and 80 K (violet). The slight shifts of the calculated patterns with respect to the measured ones are accounted for by the temperature differences.

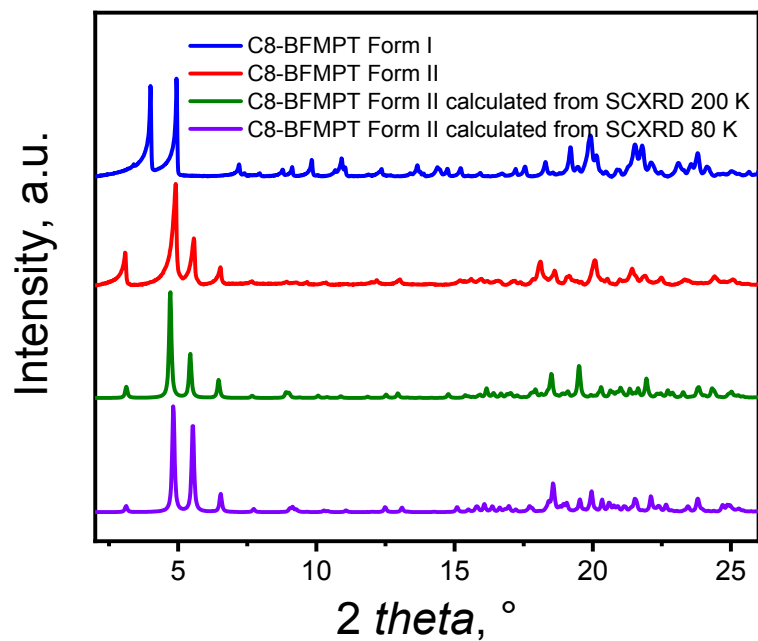

**Figure S27.** The powder X-ray diffraction patterns of C8-BFMPT: form I (blue), form II (red) at ambient temperature and the theoretical patterns of form II calculated from single-crystal X-ray data at 200 K (olive) and 80 K (violet). The slight shifts of the calculated patterns with respect to the measured ones are accounted for by the temperature differences.
